# Supplementary material
Source: publisher figshare collection journal article supplement (https://acs.figshare.com/ndownloader/files/7989802)
Supplement: Supplementary file 1 [file 7989802]

# **Supporting Information**

## **Engineering of Ferroelectric**

### **HfO<sub>2</sub>-ZrO<sub>2</sub> Nanolaminates**

*Stephen L. Weeks,<sup>1\*</sup> Ashish Pal,<sup>1</sup> Vijay K. Narasimhan,<sup>1</sup> Karl Littau,<sup>1</sup> and Tony Chiang<sup>1</sup>*

1) Intermolecular, Inc. 3011 N. 1<sup>st</sup> St. San Jose CA

Prior studies by Kim et al. on ferroelectric  $\text{HfO}_2$  has shown that decreasing the temperature in  $\text{HfO}_2$  deposition to 240 °C increased the carbon concentration to ~10 atomic percent, leading to a decrease in lateral grain size and an increase in the remanent polarization in the films. To determine if carbon incorporation was playing a role in stabilizing the ferroelectric response of the nanolaminates in this study, high resolution x-ray photoelectron spectroscopy (XPS) scans in the C1s region were collected on the nanolaminates deposited at both 260 and 285 °C. The scans were collected after cleaning the surface with an Ar ion gun for 30s to remove adventitious carbon signal and are shown in figure S1. The scans reveal no C in the films within the detection limit of XPS in all of the films regardless of temperature, indicating the any C in the film is much less than the 10 atomic percent threshold where Kim et al. observed impurity induced stabilization. This leads us to conclude that C impurities aren't contributing to the observed ferroelectric response of the nanolaminates in this study.

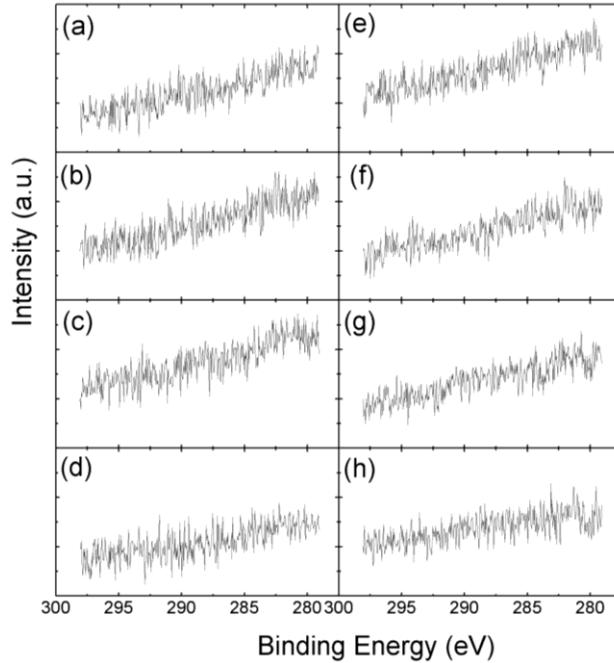

**Figure S1.** XPS scans of the C1s region for the  $\text{HfZrO}_4$  solid solution,  $(1\text{nm HfO}_2/1\text{nm ZrO}_2)\times 4$ ,  $(2\text{nm HfO}_2/2\text{nm ZrO}_2)\times 2$ , and  $(4\text{nm HfO}_2/4\text{nm ZrO}_2)$  nanolaminates for films deposited at 285 °C are shown in (a, b, c, and d) respectively, while the scans from those deposited at 260 °C are shown in (e, f, g, and h) respectively.
